1  
2  
3  
4  
5  
6  
7  
8  
9  
10  
11  
12  
13  
14  
15  
16  
17  
18  
19  
20  
21  
22  
23  
24  
25  
26  
27  
28  
29  
30  
31  
32  
33

## A Synthetic Biology Approach to Sequential Stripe Patterning and Somitogenesis

Fuqing Wu,<sup>1†</sup> Chaghan He,<sup>2</sup> Xin Fang,<sup>3</sup> Javier Baez,<sup>2</sup> Thai Ohnmacht,<sup>4‡</sup> Qi Zhang,<sup>1</sup> Xingwen Chen,<sup>1</sup> Kyle R. Allison,<sup>3</sup> Yang Kuang,<sup>2</sup> Xiao Wang<sup>1\*</sup>

<sup>1</sup>School of Biological and Health Systems Engineering, Arizona State University, Tempe, AZ 85287, USA.

<sup>2</sup>School of Mathematical and Statistical Sciences, Arizona State University, Tempe, Arizona 85287, USA

<sup>3</sup>Wallace H. Coulter Department of Biomedical Engineering, Georgia Institute of Technology and Emory University; Division of Infectious Diseases, Department of Medicine, Emory University School of Medicine; Emory Antibiotic Resistance Center, Atlanta, Georgia, 30322, USA

<sup>4</sup>School of Life Sciences, Arizona State University, Tempe, AZ 85287, USA.

<sup>†</sup>Current address: Department of Biological Engineering, Massachusetts Institute of Technology, 500 Technology Square, Cambridge, MA, 02139, USA.

<sup>‡</sup>Current address: Burrell College of Osteopathic Medicine, Las Cruces, New Mexico, 88001, USA

\* Corresponding author:

Xiao Wang, Ph. D.

School of Biological and Health Systems Engineering,  
Arizona State University, Tempe, AZ 85287, USA.

Tel: 1-480-727-8696

Fax: 1-480-727-7624

E-mail: xiaowang@asu.edu.

1 **Abstract**

2 Reaction-diffusion (RD) based clock and wavefront model has long been proposed as the  
3 mechanism underlying biological pattern formation of repeated and segmented structures  
4 including somitogenesis. However, systematic molecular level understanding of the  
5 mechanism remains elusive, largely due to the lack of suitable experimental systems to  
6 probe RD quantitatively *in vivo*. Here we design a synthetic gene circuit that couples gene  
7 expression regulation (reaction) with quorum sensing (diffusion) to guide bacterial cells  
8 self-organizing into stripe patterns at both microscopic and colony scales. An  
9 experimentally verified mathematical model confirms that these periodic spatial structures  
10 are emerged from the integration of oscillatory gene expression as the molecular clock and  
11 the outward expanding diffusions as the propagating wavefront. Furthermore, our paired  
12 model-experiment data illustrate that the RD-based patterning is sensitive to initial  
13 conditions and can be modulated by external inducers to generate diverse patterns,  
14 including multiple-stripe pattern, target-like pattern and ring patterns with reversed  
15 fluorescence. Powered by our synthetic biology setup, we also test different topologies of  
16 gene networks and show that network motifs enabling robust oscillations are foundations  
17 of sequential stripe pattern formation. These results verified close connections between  
18 gene network topology and resulting RD driven pattern formation, offering an engineering  
19 approach to help understand biological development.

20

21

22

23 **Main text**

24 Turing's seminal work first proposed reaction-diffusion (RD) as the "chemical basis of  
25 morphogenesis" over six decades ago <sup>1</sup>. It provides a general theoretical foundation of  
26 pattern formation via RD mechanisms. Two decades later, RD driven clock and wavefront  
27 (CW) mechanism was hypothesized as the mechanism underlying formation of repeated  
28 and segmented structures such as somites in development <sup>2</sup>. Since then, although RD driven  
29 pattern formation has been demonstrated or identified in chemical, physical, and ecological  
30 systems <sup>3-10</sup>, its much-hypothesized role in multicellular pattern formation hasn't been fully  
31 studied biologically. This is largely due to the lack of suitable model systems to test such  
32 hypotheses. For example, somite development requires precise temporal and spatial  
33 coordination between a heterogeneous web of intracellular responses and intercellular

1 communications, both under control of complex gene regulation networks and influences of  
2 universal gene expression stochasticity. Such complexity poses a great challenge to fully  
3 understand mechanistic basis of somite formation *in vivo*. Engineered microbes carrying  
4 rationally designed gene circuits provide an effective venue to study this problem from  
5 bottom up. Previous studies using synthetic circuits have demonstrated formation of  
6 predefined patterns, cell motility based stripe formation, and scale invariant ring pattern  
7 formation<sup>11-15</sup>. However, gene network directed RD based clock and wavefront pattern  
8 formation, despite its importance in developmental biology and extensive theoretical  
9 studies<sup>16-22</sup>, has not been experimentally realized.

10  
11 Past studies have suggested that nonlinear multistable systems could also direct  
12 spatiotemporal pattern formation when coupled with external diffusion process<sup>23-25</sup>.  
13 Following this strategy to achieve a multicellular pattern formation, we designed and  
14 constructed a mutually inhibitory network with positive autoregulation and  
15 communications (MINPAC) by expanding our previously demonstrated quadrastable gene  
16 circuit<sup>26</sup> with added quorum-sensing modules to enable intercellular communications (Fig.  
17 1A and 1B).

18  
19 Specifically, the MINPAC topology is built upon two hybrid promoters *Plas/tet* and *Plux/lac*,  
20 which harbor high nonlinearity and inducibility (Fig. 1A and Fig. S1). *Plas/tet* drives *LasR*,  
21 *LuxI* and *LacI* expression, representing the node X in Fig. 1B, whereas *Plux/lac* regulates  
22 transcription of *LuxR*, *LasI*, and *TetR*, representing the node Y. *LasI* and *LuxI* are synthases  
23 that catalyze the synthesis of autoinducer 3-oxo-C12-HSL (C12) and 3-oxo-C6-HSL (C6),  
24 respectively. The two small autoinducers can diffuse out of and into cells to mediate cell-cell  
25 communication and coordinate population behaviors on a spatial domain. *LasR* and *LuxR*  
26 activate *Plas/tet* and *Plux/lac* in the presence of C12 and C6, respectively, forming positive  
27 autoregulations. IPTG inhibits the repressive effect of *LacI* on *Plux/lac*, and aTc counteracts  
28 *TetR* inhibition on *Plas/tet*, forming the mutual inhibitions. Green fluorescent protein (GFP)  
29 and mCherry protein serve as the corresponding reporters of *Plux/lac* and *Plas/tet* activities  
30 in living cells (Fig. 1A).

31  
32  
33

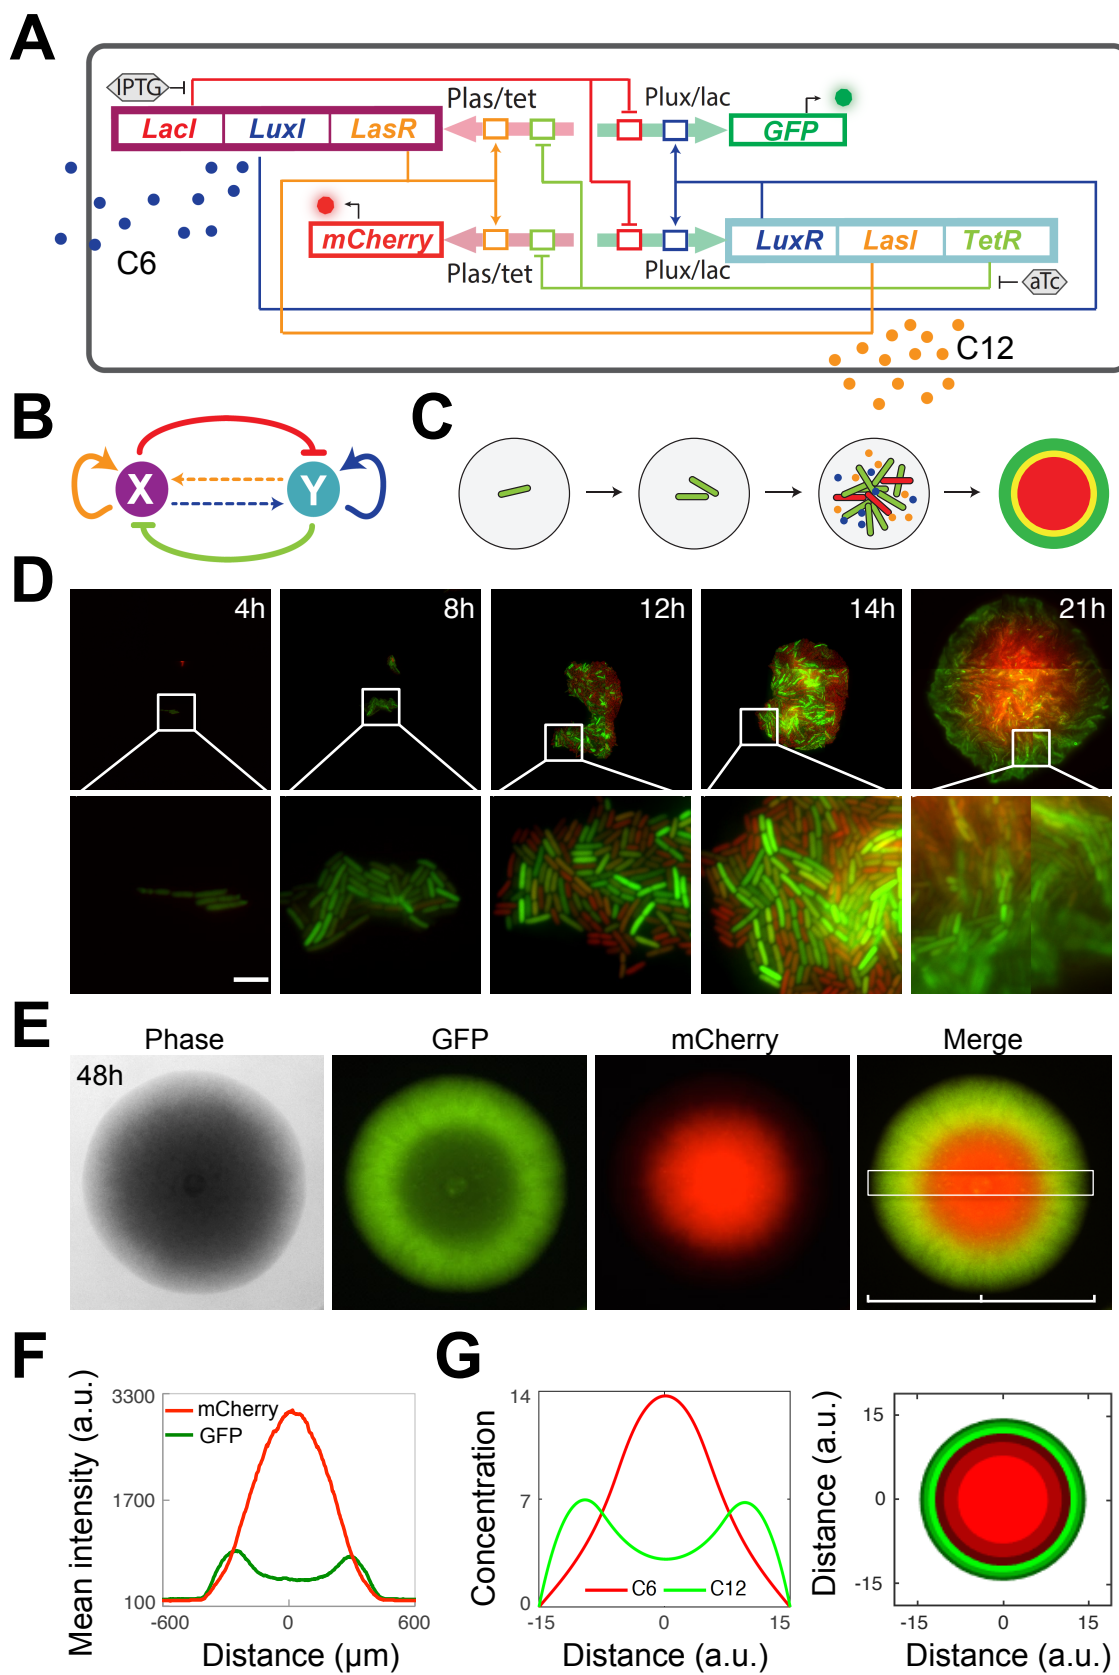

1

1 **Fig. 1.** Conceptual and experimental design of MINPAC, and reaction-diffusion based pattern  
2 formation. **(A)** Experimental design of the MINPAC network. *Plas/tet* (pink arrow) can be activated  
3 by LasR (yellow) and repressed by TetR (light green), while *Plux/lac* (green arrow) can be  
4 activated by LuxR (blue) and repressed by LacI (red). LuxI (blue) synthesizes C6 (blue dots) to  
5 bind with LuxR to activate *pLux/lac*, while LasI (yellow) synthesizes C12 (yellow dots) to bind with  
6 LasR to activate *Plas/tet*. GFP and mCherry serve as reporters for *Plux/lac* and *Plas/tet*. **(B)**  
7 Abstract diagram of MINPAC topology, where X and Y mutually inhibit each other (T-bars) and  
8 auto-activate (arrowheads) itself, meanwhile X and Y can mutually activate through small  
9 autoinducer mediated intercellular communication (dashed arrowheads). Genes and regulations  
10 are color-coded corresponding to the circuit in **(A)**. **(C)** Illustration of a ring pattern formation from  
11 a single *E. coli* cell harboring MINPAC circuit. **(D)** MINPAC directs single cells to self-organize  
12 into ring pattern at microscopic scale. Representative experiments of pattern formation from  
13 single cell to colony by time-lapse microscopy (Scale bar represents 5  $\mu\text{m}$ ). The 21-hr image is  
14 captured and combined by four individual images. **(E)** MINPAC cells self-organized double-ring  
15 pattern at colony scale. Representative fluorescence images are taken at 48 hr. Magnification: 2x.  
16 **(F)** Mean fluorescence intensity across the center of pattern-generating colony (white box in **E**).  
17 Distance indicates the size of the colony. **(G)** Left: PDE model simulations of the extracellular C6  
18 and C12 concentrations, which are corresponding to mCherry and GFP intensities, respectively.  
19 Right: Two-dimensional ring pattern simulated from the model, with high C6 concentration (red)  
20 for cells in the core and high C12 concentration (green) on the edge of the colony, forming a  
21 similar double-ring pattern as in **(E)**.

22

23

24 To investigate whether MINPAC could direct single cells to self-organize into spatial  
25 patterns, we transformed the circuit into *E. coli* cells and serially diluted cell cultures into  
26 single cells before seeding on a semi-solid minimal M9 medium (Fig. 1C). Using live single-  
27 cell time-lapse fluorescence microscopy, we observed the early stage of pattern formation  
28 (Fig. 1D). After an initial phase of uniform fluorescence (4 & 8 hours), we observed that cells  
29 differentiated into equivalent numbers of green and red fluorescence in a disordered,  
30 seemingly-random, spatial distribution (12 & 14 hours). As microcolonies grew to  $\sim 100 \mu\text{m}$   
31 in diameter (between 14 and 21 hours of growth), a red-center green out-circle  
32 fluorescence pattern starts to emerge (Fig. 1D). These results illustrate that our engineered  
33 pattern formation is scale-dependent at the early stage and the pattern starts to emerge  
34 only after cell number reaches a certain threshold. We reason that as the stochastic growth  
35 progresses through time, while outcomes of cell-cell variability are hard to predict initially

1 or at microscopic scale, the population starts to synchronize and converge to a collective  
2 behavior and become more predictable as time progress or at macroscopic scale.

3

4 To further investigate the circuit's capability in directing pattern formation at macroscopic  
5 scale, we carried out long term experiment by culturing single cell initiated colonies on agar  
6 plates up to 96 hours. Time-lapse colony imaging results show that the single colony has no  
7 obvious pattern at 15 hr and exhibits a weak yellow flat disk, suggesting cells express either  
8 GFP or mCherry are distributed without order (Fig. S2). This is consistent with our  
9 microscopic observations. After 24 hr, cells in the colony started to differentially and  
10 orderly express GFP and mCherry and self-organize into a stable double-ring pattern of an  
11 outer GFP-ring and inner mCherry disk at 48 hr (Fig. 1E and S2), with a small temporary  
12 yellow ring between these two rings (Fig. S2). The double-ring pattern is stable with time.  
13 Fluorescence quantification also confirms higher GFP expression for cells on the edge of the  
14 colony and higher mCherry expression for cells in the center (Fig. 1F).

15

16 To rule out the possibility that circuit-independent factors such as nutrition or growth are  
17 responsible for the pattern, we tested two control circuits: one with GFP and mCherry  
18 expressed from constitutive promoters, and the other one with GFP and mCherry expressed  
19 from hybrid promoters *Plas/tet* and *Plux/lac*. No obvious ring patterns were observed at 24  
20 or 48 hrs (Fig. S3). Therefore, we conclude that MINPAC circuit is responsible for the self-  
21 organized ring pattern in single colonies.

22

23 Toward a quantitative and mechanistic understanding of the ring patterning process, we  
24 next built a partial differential equation (PDE) model to mathematically describe the  
25 production, regulation, transport, and diffusion of autoinducers C6 and C12. LuxI and LasI's  
26 expression in MINPAC governs the synthesis of C6 and C12, which can diffuse out of and  
27 back into cells to further regulate the intrinsic transcriptional network MINPAC and  
28 determine cells' fate spatially. Thus, the extracellular C6 and C12 kinetics serve as a  
29 predictive snapshot of the spatial pattern and could represent the differential expression of  
30 mCherry and GFP, respectively (see Supplemental materials for more details). Fitted with  
31 biologically feasible parameters, our model shows the two autoinducers harbor similar  
32 dynamics to experimental fluorescence intensities across the colony and can reproduce  
33 experimentally observed ring pattern in two-dimensional geometry (Fig. 1G). Such

1 corroboration between the RD-based PDE model and experimental results further verified  
 2 that observed ring pattern is the result of MINPAC regulated RD process.  
 3

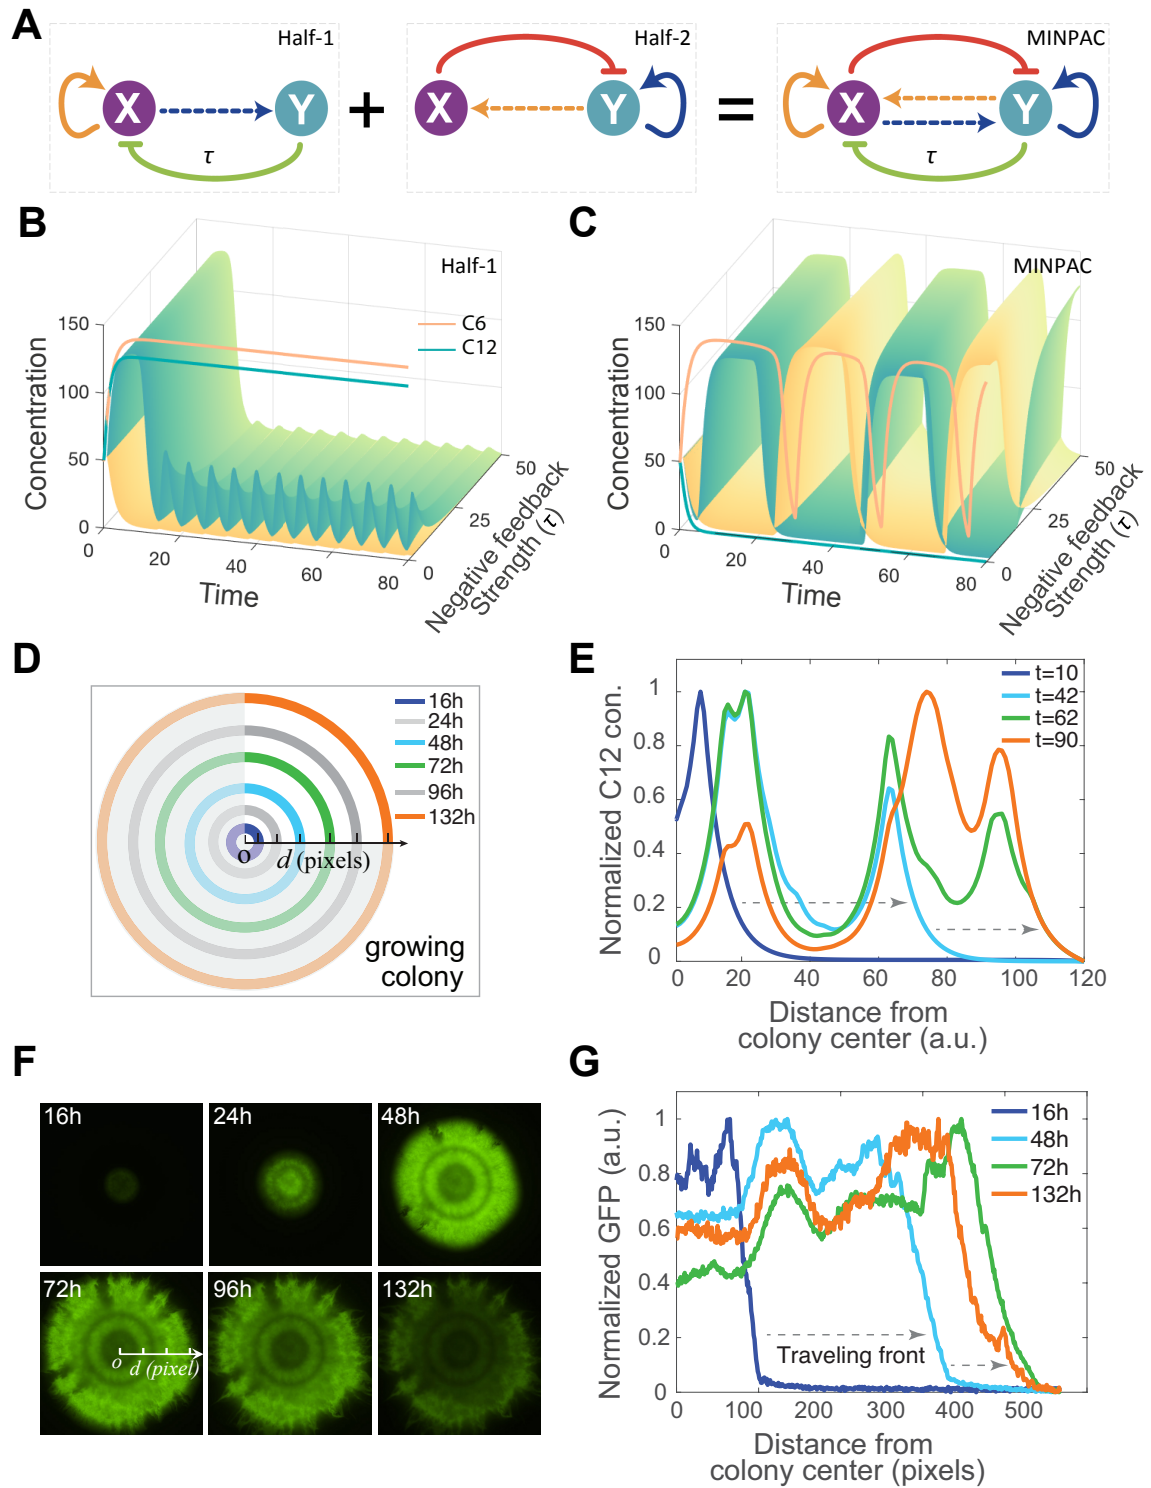

4

1 **Fig. 2. MINPAC directs ring pattern formation through a reaction-diffusion based clock and**  
2 **wavefront mechanism. (A)** Illustration of the MINPAC composition of two symmetric positive-  
3 plus-negative oscillator motifs. Parameter  $\tau$  is used to describe the strength of one negative  
4 feedback (node Y inhibits node X). **(B-C)** Model comparison between one-motif topology and two-  
5 motif MINPAC. Oscillation from one-motif topology is highly dependent on the parameter  $\tau$  **(B)**,  
6 whereas MINPAC harbors a greater robustness and amplitude against parameter  $\tau$  changes to  
7 generate temporal oscillation **(C)**. Cyan and yellow colormaps represent the C6 and C12  
8 concentrations, respectively. The red and blue solid lines are C6 and C12 concentrations when  $\tau$   
9 equals to 0 (i.e. no negative feedback). **(D)** Diagram of a growing colony. Circles with different  
10 colors indicate the colony position at different time points. Center is labeled as  $o$ , and  $d$  is the  
11 distance to the center of the colony. **(E)** Normalized external C12 concentration, directly  
12 correlated with experimental GFP intensities, of a pattern-growing colony with time and space  
13 from the PDE model simulation. Starting from the center of a colony, colored curves represent  
14 C12 concentrations along the colony radius at different time points. Grey arrows indicate the  
15 traveling direction of the wave front. **(F)** Time course of a growing colony having multiple GFP  
16 rings. **(G)** Quantified temporal and spatial fluorescence intensities of the multiple GFP ring-  
17 forming colony in **(F)**, showing similar dynamics to model simulation in **(E)**. The distance starts  
18 from center of the colony from 16 hr to 132 hr. Each pixel is 3.22  $\mu\text{m}$ .

19  
20

21 To further investigate how MINPAC directs the generation of ring pattern, we carried out  
22 deterministic analysis for the reaction term of the RD model (i.e. the ODE part). Time series  
23 shows that MINPAC has an oscillating reaction part (Fig. S4A), suggesting the temporal  
24 oscillation could drive an organized pattern formation across the expanding colony. From a  
25 network topology point of view, MINPAC is composed of two topologically equivalent motifs  
26 where a self-activating node activates the other node and it in turn inhibits the self-  
27 activating node (Fig. 2A), each forming a robust positive-plus-negative oscillator topology  
28 <sup>27-29</sup>. A fully symmetric MINPAC topology would rapidly go to stable steady states without  
29 oscillation, but little asymmetry between the two motifs would lead to a robust oscillation  
30 (Fig. S5). Our model-comparison results show that oscillation from one-motif topology is, as  
31 previously reported, highly dependent on the strength of its negative feedback ( $\tau$ ), which is  
32 vital for cyclic gene expression<sup>27,30,31</sup> (Fig. 2B). However, the two-motif MINPAC harbors a  
33 greater robustness and amplitude against parameter perturbations to generate temporal  
34 oscillation (Fig. 2C). Such robustness enhances the likelihood of observing our desired  
35 phenotypic outputs from the synthetic gene circuit.



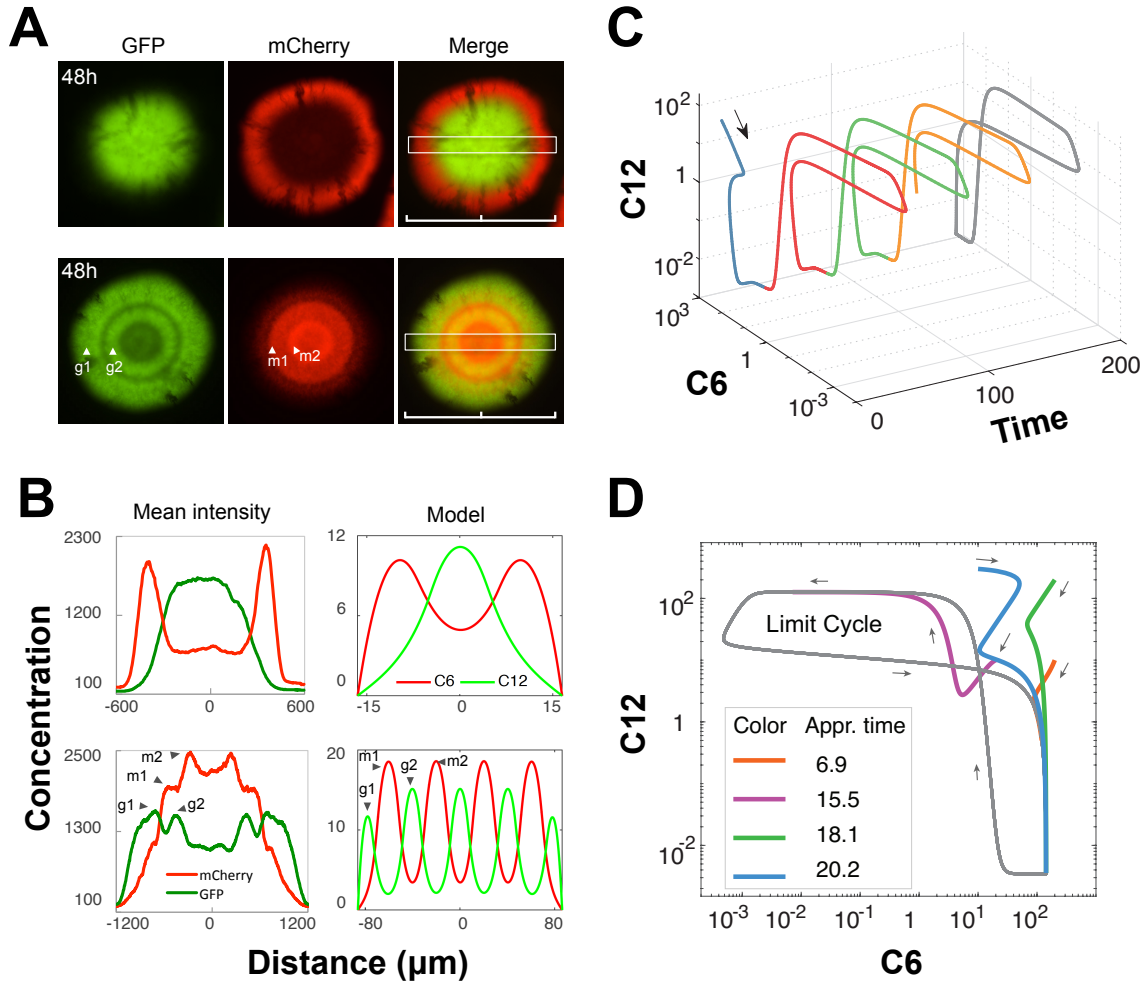

1  
2  
3  
4  
5  
6  
7  
8  
9  
10  
11  
12  
13  
14  
15  
16

**Fig. 3. Initial conditions and associated approaching time lead to diverse patterns.** (A) Two observations distinct to Fig. 1E generated by MINPAC circuit. Top: a ring pattern with a GFP core and a mCherry outer ring; Bottom: a multiple GFP-mCherry ring pattern. (B) Left: Mean fluorescence intensities across the center of the ring-forming colonies in (A). Rings corresponding to the peaks are labeled. Right: Model simulations recapitulate experimental patterns only through changing the initial conditions of the model. (C) A trajectory of a random initial point (black arrow) going to oscillation periods (red, green and yellow curves) simulated from MINPAC reaction term. The grey “butterfly” curve illustrates the limit cycle. (D) Approaching time for different initial conditions. Colored curve shows the trajectory before stable oscillations and the approaching time is calculated for the solution going from its starting point to the stable limit cycle (grey curve).

1 In our MINPAC circuit, promoter functionality tests show LacI is less efficient to inhibit  
2 promoter *Plux/lac* (Fig. S1A) compared to tetR to *Plas/tet* (Fig. S1B), supporting that the  
3 asymmetric MINPAC could maintain an oscillatory gene expression profile as the molecular  
4 clock. Moreover, the autoinducers' physical diffusion on the agar medium and colony  
5 outward expansion (represented as one diffusion term in the PDE model) constitute the  
6 propagating wavefront. Finally, the integration of clock and wavefront gates the engineered  
7 bacterial cells into subgroups and segment spatially, generating periodic structures. This  
8 reaction-diffusion based pattern formation is widely used to explain somitogenesis in  
9 development <sup>2,20,21</sup>.

10  
11 One interesting phenomenon among vertebrate species is the variations of somite numbers,  
12 which is determined by the axis growth and presomitic mesoderm lifetime during  
13 embryogenesis <sup>32,33</sup>. Analogously, we would expect multiple or even indefinite number of  
14 stripes for a continuously growing colony (illustrated in Fig. 2D), and colonies with different  
15 sizes would have different number of stripes when the oscillation frequency and colony-  
16 expanding rates were constant across colonies. With our PDE model, we simulated the  
17 temporal dynamics of C12 on the spatial scale and new peaks emerged periodically at the  
18 wavefront (Fig. 2E, S4B). Experimentally, ring patterns with multiple stripes were also  
19 observed sequentially by time lapse imaging of large colonies (Fig. 2F-G), as model  
20 predicted. Collectively, these results suggest that the ring patterns we observed are the  
21 outcomes of the spatiotemporal interaction of oscillatory dynamics owing to the network  
22 topology and the movement stemming from the diffusion process.

23  
24 However, even a macroscopic RD system could still be highly sensitive to initial conditions  
25 due to the nonlinearity of the network interactions, evidenced by diverse patterns shown in  
26 Fig. 3A, some colonies self-organize into a reversed double-ring pattern with GFP  
27 accumulating in the inner ring and mCherry on the outer ring (top). A more complicated  
28 pattern is also observed, in which two GFP rings alternating with two mCherry rings,  
29 forming a multiple GFP-mCherry ring pattern (Fig. 2F and 3A, bottom). Given that these  
30 different patterns emerge from the same MINPAC circuit operating in the same cells and  
31 under the same conditions, we hypothesize that it is due to random variations of the initial  
32 concentrations of intracellular proteins and autoinducers. To computationally test this  
33 hypothesis, we tested various initial conditions of the PDE but kept all the parameters the

1 same. The model indeed reproduces the experimental patterns (Fig. 3B). Furthermore,  
2 these differences of the patterns suggest the system is not at steady state and, instead, is  
3 evolving towards the steady state. The initial condition determines the starting point of the  
4 MINPAC system, which will go through a temporal “non-oscillating” spiral (blue line in Fig.  
5 3C) and finally approach oscillation periods (starting from red curve in Fig. 3C).  
6 Quantitative simulations show that the oscillatory system, with different initial points, could  
7 require significantly different times, so called Poincare return time, to approach the first  
8 stable limit cycle (Fig. 3D). Thus, the initial condition and resulting approach-time variances  
9 lead to diverse patterns with different stripes (besides colony size). These results illustrate  
10 that initial conditions play an important role in shaping the formation of biological patterns,  
11 which is consistent with recent theoretical analysis <sup>16,34</sup>. Furthermore, the experiment-  
12 model consistency entices us to use this model to analyze and predict newly emerged  
13 patterns under different contexts.

14

15 To further examine the pattern’s controllability, we next sought to apply external inducers  
16 to perturb the regulations of MINPAC and hence pattern formation. C6, when applied  
17 externally, would promote GFP expression and also LasI and TetR production, which could  
18 both activate and inhibit mCherry expression. So the net impact of C6 induction is nonlinear  
19 and nontrivial. Using the PDE model to simulate C6 application, it is predicted that we can  
20 expect a multiple GFP-mCherry ring pattern when MINPAC is induced with external C6 (Fig.  
21 4A, top). Experimentally, we supplemented the medium with  $1 \times 10^{-8}$  M C6 and grow the  
22 colony following the same protocol. Results show that the colony first formed an outer GFP  
23 ring and a reddish yellow core at 24 hr, which became a red core at 60 hr (Fig. S6A).  
24 Strikingly, two GFP rings emerged at 77 hr whereas mCherry mostly accumulated in the  
25 center (Fig. 4B top, and Fig. S6A). Quantified fluorescence intensities also illustrate there are  
26 four peaks for GFP and one significant peak for mCherry, which is in line with model  
27 predictions (Fig. 4B). We noticed the inconsistent dynamics between predicted C6  
28 concentrations and measured mCherry intensities, which is probably because of the slow  
29 degradation rate of mCherry protein in living cells. Similarly, external C12 induction results  
30 in two GFP rings with unbalanced intensities (Fig. S6B).

31

32

33

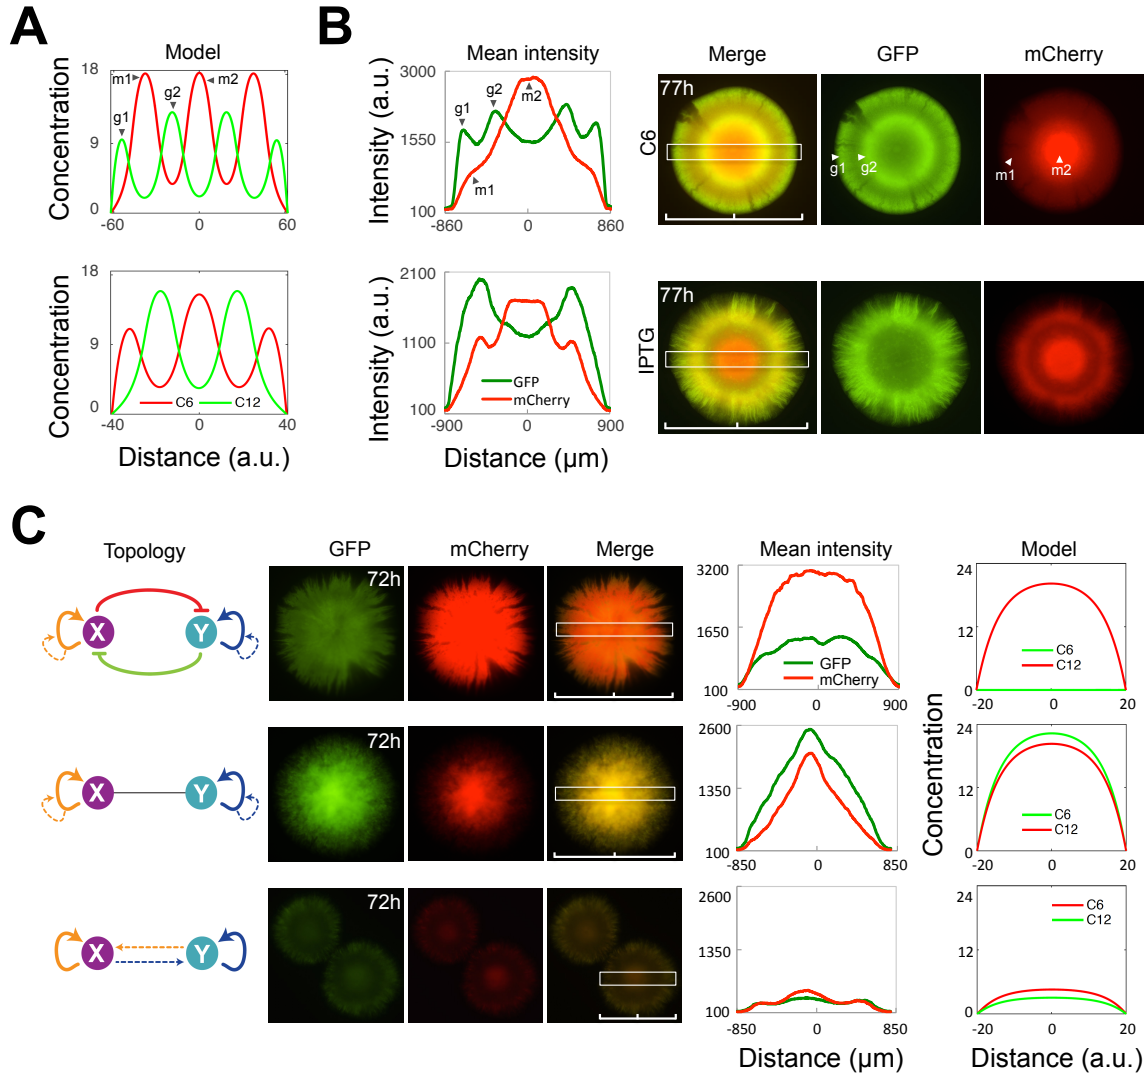

1  
2 **Fig. 4. MINPAC directed patterning is tunable and intrinsic to its network topology.** (A)  
3 Model predictions of the pattern under external inducers C6 (top) and IPTG (bottom). (B)  
4 Experimental validations for model predictions, with C6 and IPTG induction. Top: two GFP rings  
5 were observed experimentally under  $10^{-8}$  M C6 induction at 77 hr. Its mean fluorescence intensity  
6 across the colony is similar to model prediction (A, top). Bottom: a target-like mCherry ring and an  
7 outer GFP ring were observed under  $10 \mu$ M IPTG induction. The mean fluorescence intensity is  
8 consistent to model prediction (A, bottom). Time course of pattern generation can be found in Fig.  
9 S6. (C) Three control circuits' topology and directed patterns. All the circuits are constructed with  
10 the same molecular components in MINAPC. Top left: A perturbed MINPAC topology. The  
11 intercellular X-Y communications are replaced by intercellular auto-activation of X and Y. No  
12 specific pattern is observed experimentally. Middle left: Mutual inhibition is removed and  
13 communication is replaced by intercellular auto-activation of X and Y. Strong GFP and mCherry  
14 are simultaneously expressed and merged fluorescence is yellow. Bottom left: All regulatory

1 edges are kept but the mutual inhibition module is removed. A weak yellow core and outer ring is  
2 observed. Middle: Mean fluorescence intensities across the center of the ring patterns. Right:  
3 Model simulations of the three control circuits show consistency to experimental results.

4  
5  
6 IPTG and aTc induction, on the other hand, can modulate the strength of mutual inhibition  
7 in the circuit. IPTG counteracts LacI's inhibition on *Plux/lac*, leading to more *LasI* expression  
8 and intracellular C12 production. Simulating these changes by perturbing corresponding  
9 parameters, the model predicts a target-like mCherry ring with an outer GFP ring pattern  
10 (Fig. 4A, bottom), which is further verified by our experimental data (Fig. 4B, bottom). Time  
11 course shows that cells in the inner side of the GFP ring started to express mCherry,  
12 showing as a yellow ring, at ~60 hr and was stable till 124 hr (Fig. S6A). Inducer aTc's  
13 impacts are similarly predicted and experimentally confirmed (Fig. S6C). Taken together,  
14 these results illustrated the controllability of the MINPAC circuit and its directed patterns  
15 formation. It is noteworthy that these patterns generated in single colonies autonomously  
16 without any predefined spatial cues and the regular structures are robust and stable once  
17 formed.

18  
19 Since the synthetic circuit directed cell-cell communication is established as a viable  
20 strategy to generate RD-based and tunable patterns, we employ this method to study the  
21 fundamental question of relationship between gene network topology and resulting  
22 multicellular pattern. We first designed a perturbed MINPAC topology, where the  
23 intercellular X-Y communication modules are replaced by intercellular auto-activations of X  
24 and Y (Fig. 4C, top, specific experimental design can be found in Fig. S7). Although there is  
25 still autoinducer diffusion, this circuit mitigates the interactions and dependency between X  
26 and Y and would remarkably change the intrinsic dynamics. Both experimental observation  
27 and model simulation showed no specific pattern but a reddish colony (Fig. 4C, top row).  
28 Starting from this topology, we further removed the mutual inhibition module to construct  
29 a circuit with two positive feedback motifs (Fig. 4C, middle row), reinforced by intercellular  
30 activations. A yellow fluorescent colony with strong GFP and mCherry expression was  
31 observed, which is consistent with the model analysis. Lastly, we engineered a sub-network  
32 of MINPAC, where the mutual inhibition is removed but keeping the other regulatory edges  
33 (Fig. 4C, bottom row). Interestingly, this mutual-activation topology drives a weak yellow  
34 target-like ring pattern with low GFP and mCherry expression (Fig. 4C, bottom row).

1 Previous theoretical studies demonstrated that mutual-activation circuit with  
2 autoregulations is multistable, and harbors a big parameter space for low-low state <sup>35,36</sup>. Our  
3 model analysis also confirms the low-GFP and low-mCherry expression in this sub-network  
4 (Fig. 4C, bottom row). Taken together, each control circuit with different topology has  
5 different fluorescence patterns but none of them show the alternating ring patterns,  
6 indicating that the multiple-ring pattern is unique to MINPAC circuit.

7  
8 Biological pattern formation requires complex gene regulation networks and accurate cell-  
9 cell coordination. Indeed, coordinated cell population behavior in response to self-regulated  
10 morphogen kinetics is a common phenomenon in development <sup>8,37,38</sup>. Here, we present the  
11 design and assembly of a synthetic gene network MINPAC, capable of directing engineered  
12 single cells to form self-organized tunable patterns with multiple rings. The PDE model  
13 simulations and experimental measurements strongly support that the observed ring  
14 patterns are driven by a RD based oscillatory gene network with propagating wavefront, the  
15 so-called clock and wavefront mechanism. It is noteworthy to point out that we used one  
16 single PDE model to recapitulate and predict all the MINPAC-directed biological patterns.  
17 Furthermore, we verified the close connections between gene network topology (circuit  
18 architecture) and its induced spatial pattern formation.

19  
20 MINPAC is a complete motif composed of intracellular transcriptional network and  
21 intercellular communication modules, both of which cross-regulate each other to direct  
22 spatial pattern formation involving the coordination of molecular gene expression, cellular  
23 population response, and positional information interpretation. In this view, the MINPAC  
24 represents a paradigm for future design of pattern-forming circuits. Moreover, similar  
25 natural counterparts of MINPAC design can be found in the interaction networks of gap  
26 genes for the anterior-posterior axis patterning in *Drosophila* <sup>39-41</sup>. Collectively, this work  
27 provides a bottom-up synthetic biology approach to generate complex spatial patterns  
28 arising from well-designed reaction-diffusion circuit motif, and integrates experimental  
29 data with analytical framework across time and spatial scales to shed lights on the  
30 molecular mechanisms of somitogenesis and biological pattern formation, which would  
31 contribute to a better understanding of the natural developmental processes, and facilitate  
32 the engineering of synthetic tissues in the future.

33

1  
2  
3  
4  
5  
6  
7  
8  
9  
10  
11  
12  
13  
14  
15  
16  
17  
18  
19  
20  
21  
22  
23  
24  
25  
26

### References

1. Turing, A. M. The Chemical Basis of Morphogenesis. *Philos. Trans. R. Soc. Lond. B. Biol. Sci.* **237**, 37–72 (1952).
2. Cooke, J. & Zeeman, E. C. A clock and wavefront model for control of the number of repeated structures during animal morphogenesis. *J. Theor. Biol.* **58**, 455–476 (1976).
3. Lengyel, I. & Epstein, I. R. A chemical approach to designing Turing patterns in reaction-diffusion systems. *Proc. Natl. Acad. Sci. U. S. A.* **89**, 3977–3979 (1992).
4. Maini, P. K., Painter, K. J. & Chau, H. N. P. Spatial pattern formation in chemical and biological systems. *J. Chem. Soc. Faraday Trans.* **93**, 3601–3610 (1997).
5. Reeves, G. T., Muratov, C. B., Schüpbach, T. & Shvartsman, S. Y. Quantitative Models of Developmental Pattern Formation. *Dev. Cell* **11**, 289–300 (2006).
6. Meinhardt, H. Models of biological pattern formation: from elementary steps to the organization of embryonic axes. *Curr. Top. Dev. Biol.* **81**, 1–63 (2008).
7. Rietkerk, M. & van de Koppel, J. Regular pattern formation in real ecosystems. *Trends Ecol. Evol.* **23**, 169–175 (2008).
8. Kondo, S. & Miura, T. Reaction-Diffusion Model as a Framework for Understanding Biological Pattern Formation. *Science* **329**, 1616–1620 (2010).
9. Lian, X., Wang, H. & Wang, W. Delay-driven pattern formation in a reaction–diffusion predator–prey model incorporating a prey refuge. *J. Stat. Mech. Theory Exp.* **2013**, P04006 (2013).
10. Halatek, J. & Frey, E. Rethinking pattern formation in reaction–diffusion systems. *Nat. Phys.* **1** (2018). doi:10.1038/s41567-017-0040-5
11. Basu, S., Gerchman, Y., Collins, C. H., Arnold, F. H. & Weiss, R. A synthetic multicellular system for programmed pattern formation. *Nature* **434**, 1130–1134 (2005).

- 1 12. Liu, C. *et al.* Sequential establishment of stripe patterns in an expanding cell population.  
2 *Science* **334**, 238–241 (2011).
- 3 13. Payne, S. *et al.* Temporal control of self-organized pattern formation without  
4 morphogen gradients in bacteria. *Mol. Syst. Biol.* **9**, 697 (2013).
- 5 14. Cao, Y. *et al.* Collective Space-Sensing Coordinates Pattern Scaling in Engineered  
6 Bacteria. *Cell* **165**, 620–630 (2016).
- 7 15. Kong, W., Blanchard, A. E., Liao, C. & Lu, T. Engineering robust and tunable spatial  
8 structures with synthetic gene circuits. *Nucleic Acids Res.* **45**, 1005–1014 (2017).
- 9 16. Gomez, M. M. & Arcak, M. A tug-of-war mechanism for pattern formation in a genetic  
10 network. *ACS Synth. Biol.* **6**, 2056–2066 (2017).
- 11 17. Borek, B., Hasty, J. & Tsimring, L. Turing Patterning Using Gene Circuits with Gas-  
12 Induced Degradation of Quorum Sensing Molecules. *PLOS ONE* **11**, e0153679 (2016).
- 13 18. Chen, L. *et al.* Two-Dimensionality of Yeast Colony Expansion Accompanied by Pattern  
14 Formation. *PLOS Comput. Biol.* **10**, e1003979 (2014).
- 15 19. Diambra, L., Senthivel, V. R., Menendez, D. B. & Isalan, M. Cooperativity To Increase  
16 Turing Pattern Space for Synthetic Biology. *ACS Synth. Biol.* **4**, 177–186 (2015).
- 17 20. Baker, R. E., Schnell, S. & Maini, P. K. A clock and wavefront mechanism for somite  
18 formation. *Dev. Biol.* **293**, 116–126 (2006).
- 19 21. Dziekan, P., Nowakowski, B. & Lemarchand, A. Reaction-diffusion scheme for the clock  
20 and wavefront mechanism of pattern formation. *Eur. Phys. J. B* **87**, 77 (2014).
- 21 22. Cotterell, J., Robert-Moreno, A. & Sharpe, J. A Local, Self-Organizing Reaction-Diffusion  
22 Model Can Explain Somite Patterning in Embryos. *Cell Syst.* **1**, 257–269 (2015).
- 23 23. *Pattern Formation in Morphogenesis: Problems and Mathematical Issues.* (Springer-  
24 Verlag, 2013).



- 1 24. Leppänen, T., Karttunen, M., Barrio, R. A. & Kaski, K. Morphological transitions and  
2 bistability in Turing systems. *Phys. Rev. E Stat. Nonlin. Soft Matter Phys.* **70**, 066202  
3 (2004).
- 4 25. Tuszyński, J. A., Otwinowski, M. & Dixon, J. M. Spiral-pattern formation and  
5 multistability in Landau-Ginzburg systems. *Phys. Rev. B* **44**, 9201–9213 (1991).
- 6 26. Wu, F., Su, R.-Q., Lai, Y.-C. & Wang, X. Engineering of a synthetic quadrastable gene  
7 network to approach Waddington landscape and cell fate determination. *eLife* **6**,  
8 e23702 (2017).
- 9 27. Tsai, T. Y.-C. *et al.* Robust, tunable biological oscillations from interlinked positive and  
10 negative feedback loops. *Science* **321**, 126–129 (2008).
- 11 28. Danino, T., Mondragón-Palomino, O., Tsimring, L. & Hasty, J. A synchronized quorum of  
12 genetic clocks. *Nature* **463**, 326–330 (2010).
- 13 29. Chen, Y., Kim, J. K., Hirning, A. J., Josić, K. & Bennett, M. R. Emergent genetic oscillations  
14 in a synthetic microbial consortium. *Science* **349**, 986–989 (2015).
- 15 30. Pigolotti, S., Krishna, S. & Jensen, M. H. Oscillation patterns in negative feedback loops.  
16 *Proc. Natl. Acad. Sci.* **104**, 6533–6537 (2007).
- 17 31. Stricker, J. *et al.* A fast, robust and tunable synthetic gene oscillator. *Nature* **456**, 516–  
18 519 (2008).
- 19 32. Gomez, C. *et al.* Control of segment number in vertebrate embryos. *Nature* **454**, 335–  
20 339 (2008).
- 21 33. Gomez, C. & Pourquié, O. Developmental control of segment numbers in vertebrates. *J.*  
22 *Exp. Zoolog. B Mol. Dev. Evol.* **312**, 533–544 (2009).
- 23 34. Salazar-ciudad, I., Garcia-fernández, J. & Solé, R. V. Gene Networks Capable of Pattern  
24 Formation: From Induction to Reaction–Diffusion. *J. Theor. Biol.* **205**, 587–603 (2000).

- 1 35. Guantes, R. & Poyatos, J. F. Multistable Decision Switches for Flexible Control of  
2 Epigenetic Differentiation. *PLoS Comput. Biol.* **4**, e1000235 (2008).
- 3 36. Del Vecchio, D., Abdallah, H., Qian, Y. & Collins, J. J. A Blueprint for a Synthetic Genetic  
4 Feedback Controller to Reprogram Cell Fate. *Cell Syst.* **4**, 109-120.e11 (2017).
- 5 37. Kicheva, A., Cohen, M. & Briscoe, J. Developmental pattern formation: insights from  
6 physics and biology. *Science* **338**, 210–212 (2012).
- 7 38. Scholes, N. S. & Isalan, M. A three-step framework for programming pattern formation.  
8 *Curr. Opin. Chem. Biol.* **40**, 1–7 (2017).
- 9 39. Azevedo, R. B. R., Lohaus, R., Srinivasan, S., Dang, K. K. & Burch, C. L. Sexual reproduction  
10 selects for robustness and negative epistasis in artificial gene networks. *Nature* **440**,  
11 87–90 (2006).
- 12 40. Perkins, T. J., Jaeger, J., Reinitz, J. & Glass, L. Reverse Engineering the Gap Gene Network  
13 of *Drosophila melanogaster*. *PLoS Comput. Biol.* **2**, e51 (2006).
- 14 41. Kazemian, M. *et al.* Quantitative Analysis of the *Drosophila* Segmentation Regulatory  
15 Network Using Pattern Generating Potentials. *PLoS Biol.* **8**, e1000456 (2010).

16  
17  
18

19 **Acknowledgments:** We thank Dr. James J Collins for the *E. coli* K-12 MG1655 strain with  
20 *lac*<sup>-/-</sup>, and Dr. Saeed Tavazoie for lab access for the single-cell microscopy experiments. F.W.  
21 was supported by American Heart Association Predoctoral Fellowship 15PRE25710303  
22 (F.W.). This study was financially supported by National Science Foundation Grant DMS-  
23 1100309 and National Institutes of Health Grant GM106081 (to X.W.), 5R01GM131405-02  
24 (to Y.K.), and by a NIH Director’s Early Independence Award to K.R.A. (DP5OD019792).

25

26 **Author contributions:** F.W. and X.W. designed the research. F.W. performed the molecular  
27 cloning and patterning experiments. X.F. and K.R.A. designed and performed time-lapse  
28 microscopy experiments (agarose pad). T.O., X.C., and Q.Z. participated in the growth

1 condition experiments. F.W., C.H., J.B., Y.K., and X.W. developed the mathematical modeling  
2 and computational analysis. F.W., C.H., F.X., Y.K., K.R.A., and X.W. analyzed the data and  
3 wrote the manuscript. X.W., K.R.A., and Y.K. supervised the study.

4

5 **Competing interests:** There is no conflict of interest.

6

7 **Data and materials availability:** All the experimental materials and procedures and  
8 mathematical models are in the supplementary materials. All other data and code are  
9 available from the corresponding author upon reasonable request.

10

11

12 **Supplementary information**

13 Materials and Methods

14 Table S1 – S4

15 Fig. S1 – S7

16 References (1 – 15)

17

18

19
